# Supplementary material for: SnO2 modified CsH2PO4 (CDP) protonic electrolyte for an electrochemical hydrogen pump
Source: Royal Society of Chemistry journal article supplement (doi:10.1039/d4ya00606b), 2025-01-01
Supplement: d4ya00606b1.pdf [file d4ya00606b1.pdf]

Supporting Information

**SnO<sub>2</sub> Modified CsH<sub>2</sub>PO<sub>4</sub> (CDP) Protonic Electrolyte for Electrochemical  
Hydrogen Pump**

Minal Gupta<sup>1</sup>, Kangkang Zhang<sup>1,2</sup>, Kevin Huang<sup>1\*</sup>

*<sup>1</sup>Department of Mechanical Engineering, University of South Carolina, Columbia, South  
Carolina, 29208, USA*

*<sup>2</sup>Engineering Directorate, Lawrence Livermore National Laboratory, Livermore, CA, 94550,  
USA*

\*Email: [huang46@cec.sc.edu](mailto:huang46@cec.sc.edu)

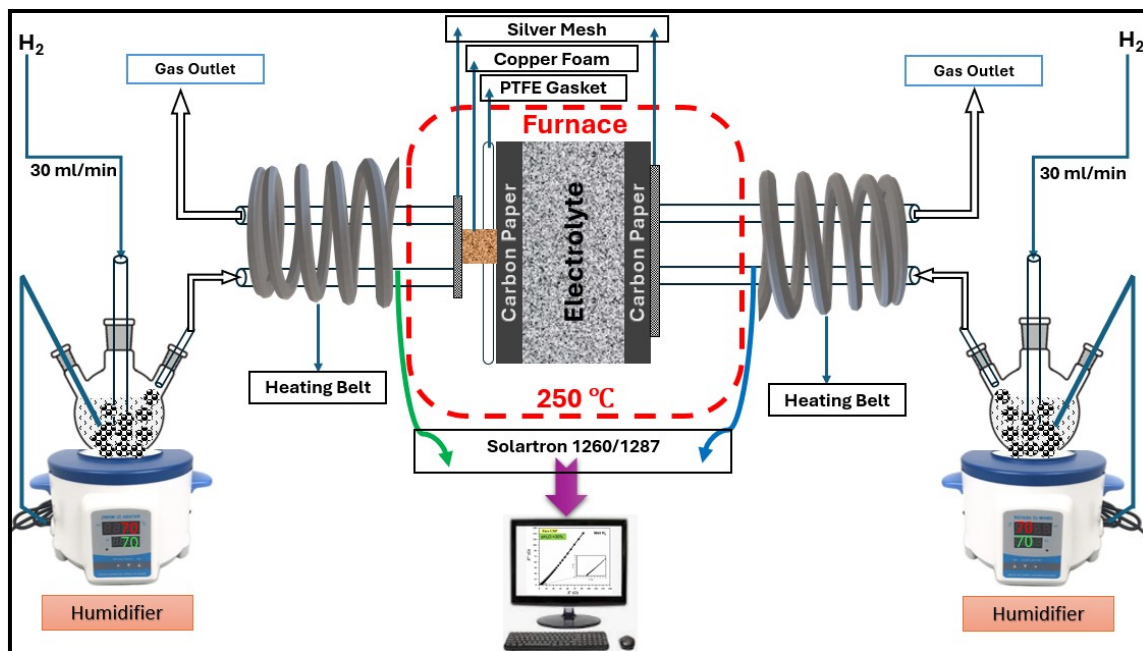

**Figure S1: Experimental setup for ionic conductivity measurement.**

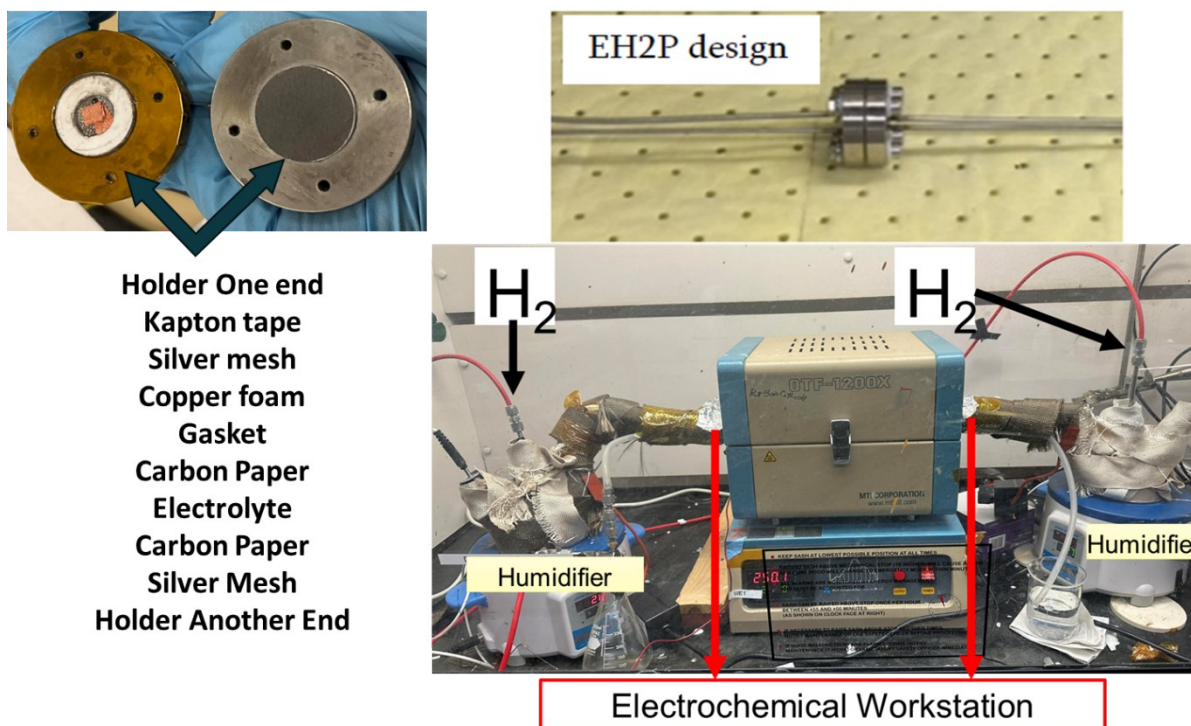

**Figure S2: The testing setup and MEA assembly used in this study.**

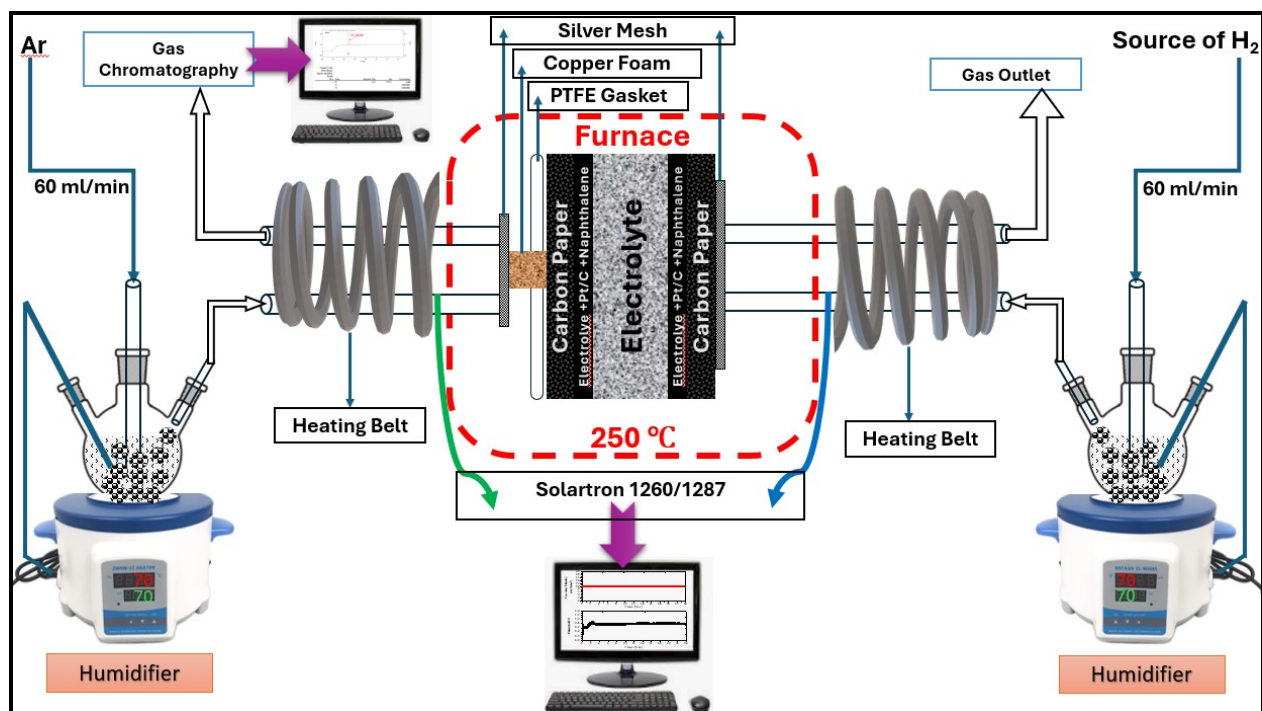

Figure S3: Experimental setup for electrochemical hydrogen pump.

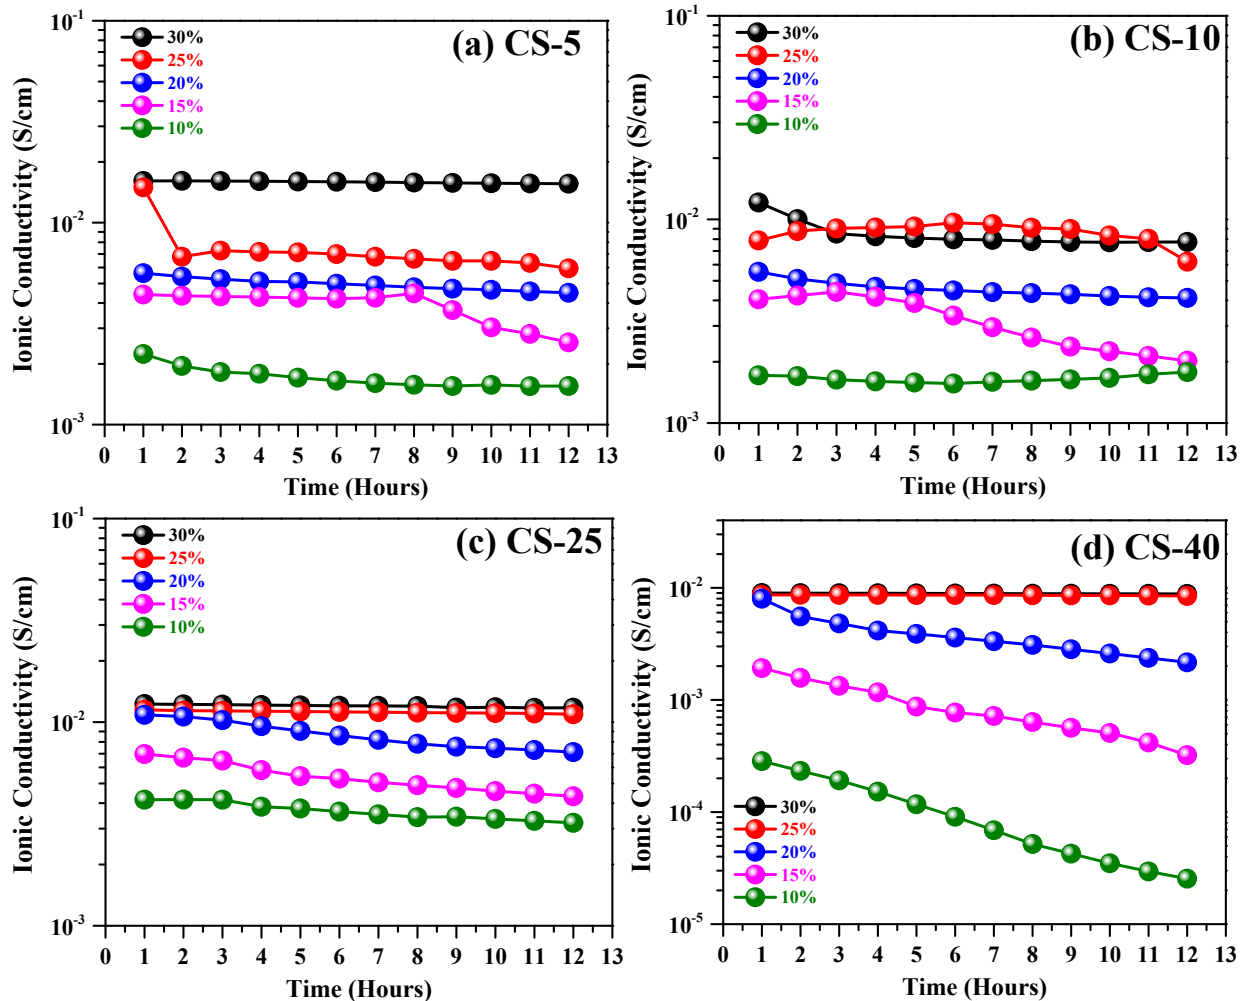

**Figure S4: Time-dependent conductivity of composite electrolytes at 25 °C in wet H<sub>2</sub> atmosphere with 30 mL/min flow rate on both the sides at different water partial pressure: (a) CS-5, (b) CS-10, (c) CS-25, (d) CS-40**

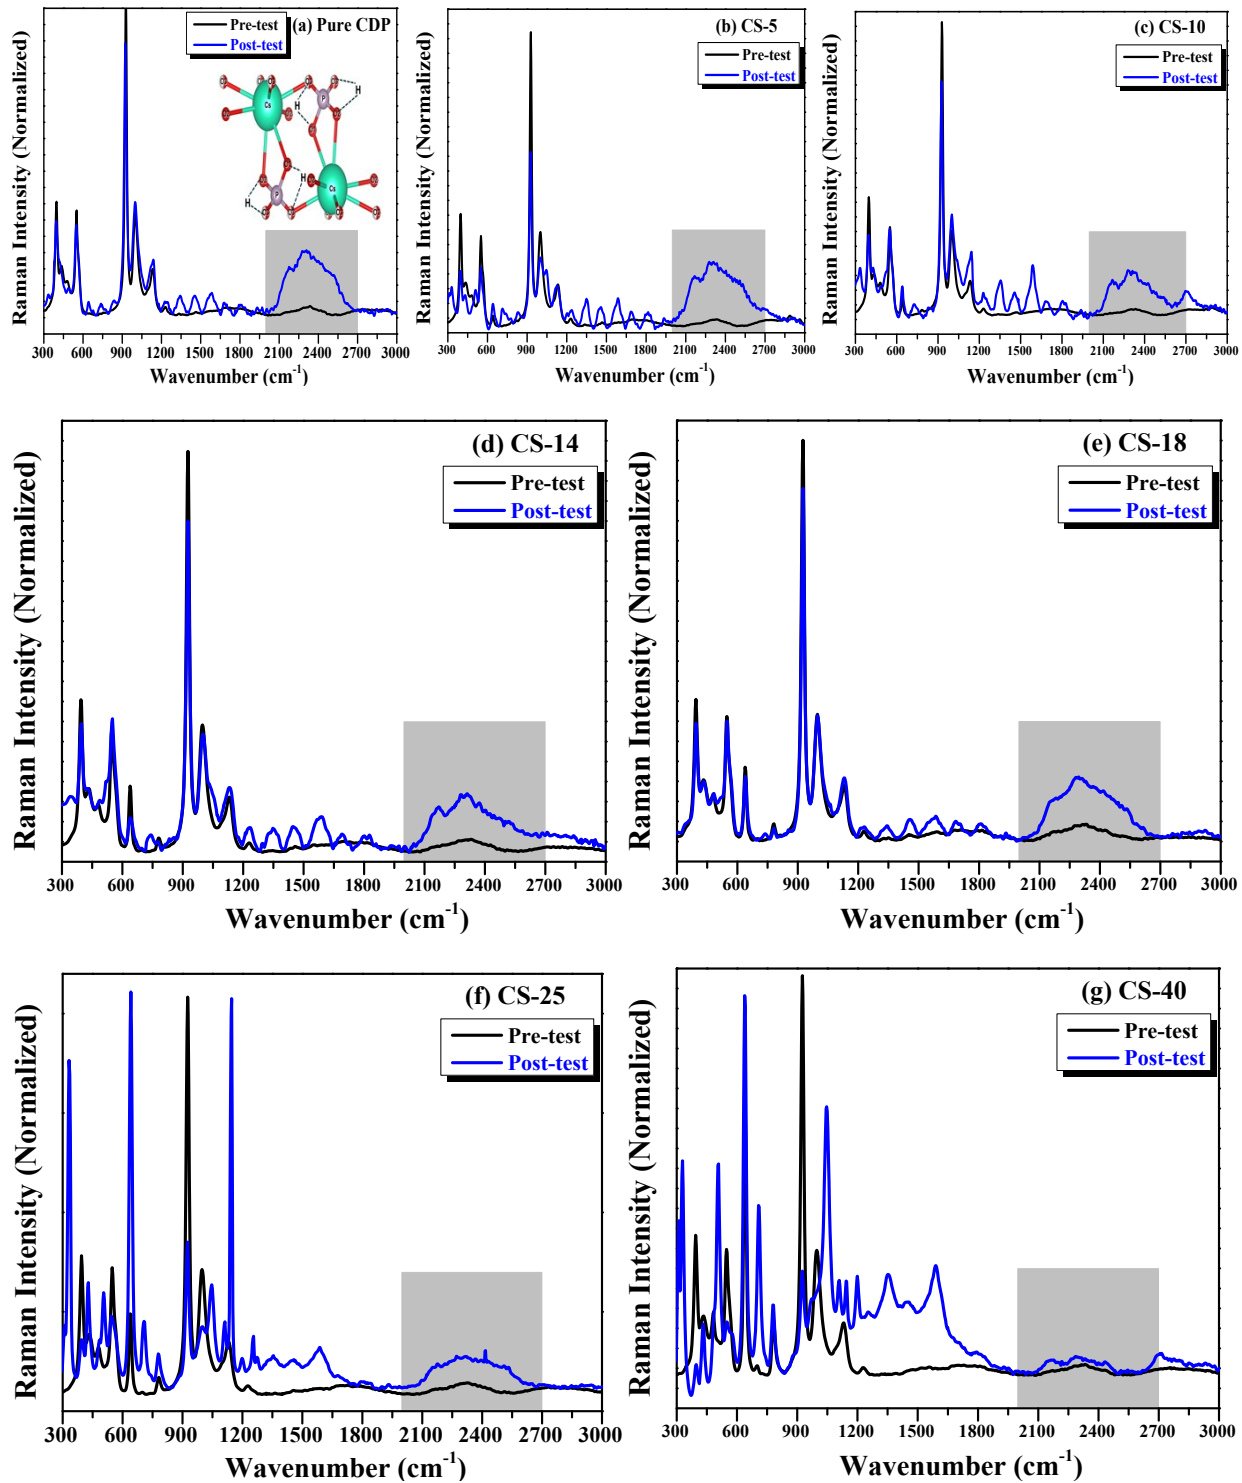

Figure S5: Pre- and post-test Raman data; (a) CDP, (b) CS-5, (c) CS-10, (d) CS-14, (e) CS-18, (f) CS-25, (g) CS-40.

**Table S1:** Water partial pressure and bubbler temperature relationship <sup>29</sup>

| Heat Bubbler Temperature (°C) | Water Partial Pressure (atm.) | Water Partial Pressure (P <sub>H2O</sub> ) (%) |
|-------------------------------|-------------------------------|------------------------------------------------|
| 70                            | 0.307448                      | ~30                                            |
| 66                            | 0.257983                      | ~25                                            |
| 61                            | 0.205755                      | ~20                                            |
| 55                            | 0.155237                      | ~15                                            |
| 47                            | 0.104719                      | ~10                                            |

**Table S2:** Crystallographic information used to perform the Rietveld refinement for CS-25 pre-test XRD data considering P21/m (11) and P42/mmm (136) space group for CDP and SnO<sub>2</sub>, respectively.

| CsH <sub>2</sub> PO <sub>4</sub> (CDP) |          |           | SnO <sub>2</sub>      |           |        |
|----------------------------------------|----------|-----------|-----------------------|-----------|--------|
| Lattice Parameters                     |          |           | Lattice Parameters    |           |        |
| a                                      | b        | c         | a                     | b         | c      |
| 4.8806                                 | 6.3867   | 7.9113    | 4.7385                | 4.7385    | 3.1867 |
| Wyckoff Position (Cs)                  |          |           | Wyckoff Position (Sn) |           |        |
| 0.0367                                 | 0.2500   | z=0.2656  | x=0                   | y=0       | z=0    |
| Wyckoff Position (P)                   |          |           | Wyckoff Position (O)  |           |        |
| x=0.5172                               | y=0.7500 | z=0.2302  | x= 0.2988             | y= 0.2988 | z=0    |
| Wyckoff Position (O1)                  |          |           |                       |           |        |
| x=0.3981                               | y=0.7500 | z= 0.3953 |                       |           |        |
| Wyckoff Position (O2)                  |          |           |                       |           |        |
| x=0.8403                               | y=0.7500 | z=0.30746 |                       |           |        |
| Wyckoff Position (O3)                  |          |           |                       |           |        |
| x=0.4432                               | y=0.9544 | z=0.1379  |                       |           |        |
